# Supplementary material for: XTX101, a tumor-activated, Fc-enhanced anti-CTLA-4 monoclonal antibody, demonstrates tumor-growth inhibition and tumor-selective pharmacodynamics in mouse models of cancer
Source: PubMed Central journal article supplement — J Immunother Cancer. 2023 Dec 12;11(12):e007785. doi: 10.1136/jitc-2023-007785 (PMC10729150; doi:10.1136/jitc-2023-007785), 2023-12-12
Supplement: jitc-2023-007785supp003.pdf [file jitc-2023-007785supp003.pdf]

| Clone# | Peptide Sequence |
|--------|------------------|
| 1      | CPGKGLPSC        |
| 2      | CPGKGLPSC        |
| 3      | CPFPAKILC        |
| 4      | CTKPAKALC        |
| 5      | CIHAPYAKC        |
| 6      | CPGKGLPSC        |
| 7      | CPFPALELC        |
| 8      | CPAKIGQEC        |
| 9      | <i>ND</i>        |
| 10     | CKHAPYALC        |

**Supplemental Table 1: Peptide Sequences of Isolated Phage Clones.** Sequences of displayed peptides from enriched individual phage clones evaluated in **Fig. 1A**. *ND* = not determined.

|                                | CPFPALC:Fab               | CPGKGLPSC:Fab            |
|--------------------------------|---------------------------|--------------------------|
| <b>Data collection</b>         |                           |                          |
| Space group                    | C 1 2 1                   | P 21 21 21               |
| Cell dimensions                |                           |                          |
| a, b, c (Å)                    | 130.18, 55.23, 73.86      | 72.43, 203.51, 225.92    |
| $\alpha, \beta, \gamma$ (°)    | 90, 118.696, 90           | 90, 90, 90               |
| Resolution (Å)                 | 24.46 - 1.8 (1.864 - 1.8) | 20.0 – 3.0 (3.107 – 3.0) |
| $R_{merge}$                    | 0.06451 (0.4702)          | 0.2699 (0.8219)          |
| $I / \sigma I$                 | 21.67 (2.05)              | 4.08 (1.63)              |
| $CC_{1/2}$                     | 0.999 (0.848)             | 0.963 (0.534)            |
| Completeness (%)               | 96.99 (79.61)             | 97.83 (99.21)            |
| Multiplicity                   | 8.3 (2.8)                 | 3.3 (3.3)                |
|                                |                           |                          |
| <b>Refinement</b>              |                           |                          |
| Resolution (Å)                 |                           |                          |
| Number of reflections          | 41567                     | 66291                    |
| $R_{work} / R_{free}$ (%)      | 18.6 / 22.5               | 23.89 / 28.82            |
| Number of atoms                |                           |                          |
| macromolecules                 | 3348                      | 19964                    |
| ligands                        | 13                        | 0                        |
| solvent                        | 541                       | 0                        |
| R.M.S. deviations              |                           |                          |
| Bond lengths (Å)               | 0.010                     | 0.003                    |
| Bond angles (°)                | 1.282                     | 0.542                    |
| Ramachandran                   |                           |                          |
| Favored / allowed / disallowed | 98.6 / 1.2 / 0.23         | 96.29 / 3.60 / 0.12      |
| PDB Code                       | 8G2M                      | 8G8N                     |

**Supplemental Table 2: Crystallographic analysis and refinement statistics for peptide:aCTLA4 crystal structures.**

| <b>Protease</b> | <b><math>k_{\text{cat}}/K_m</math> (<math>\text{M}^{-1} \cdot \text{s}^{-1}</math>)</b> | <b>SD (<math>\text{M}^{-1} \cdot \text{s}^{-1}</math>)</b> |
|-----------------|-----------------------------------------------------------------------------------------|------------------------------------------------------------|
| MMP-1           | 1.4E+04                                                                                 | 5.0E+02                                                    |
| MMP-2           | 3.1E+04                                                                                 | 3.5E+03                                                    |
| MMP-7           | 2.2E+04                                                                                 | 2.0E+03                                                    |
| MMP-9           | 4.6E+04                                                                                 | 4.5E+03                                                    |
| MMP-10          | 1.2E+03                                                                                 | 0                                                          |
| MMP-14          | 2.4E+03                                                                                 | 1.0E+02                                                    |

**Supplemental Table 3: Catalytic efficiency for activation of XTX101 with recombinant human MMPs.** SD was calculated from 2 independent experiments.

| Group | Treatment         | Dose (mg/kg) | Tumor Volume (mm <sup>3</sup> ) <sup>a</sup> on Day 16 | TGI (%) <sup>b</sup> | Complete Responses | p value <sup>c</sup> |
|-------|-------------------|--------------|--------------------------------------------------------|----------------------|--------------------|----------------------|
| 1     | Isotype Control   | 10           | 2220 ± 161                                             | -                    | 0/8                | -                    |
| 2     | Ipilimumab analog | 1            | 773 ± 158                                              | 65.2                 | 0/8                | 0.0002               |
| 3     | Ipilimumab analog | 3            | 227 ± 57                                               | 89.8                 | 2/8                | <0.0001              |
| 4     | XTX100            | 1            | 213 ± 50                                               | 90.4                 | 3/8                | <0.0001              |
| 5     | XTX100            | 3            | 135 ± 23                                               | 93.9                 | 6/8                | <0.0001              |
| 6     | XTX100            | 10           | 134 ± 32                                               | 94                   | 4/8                | <0.0001              |
| 7     | XTX101            | 1            | 434 ± 140                                              | 80.5                 | 2/8                | <0.0001              |
| 8     | XTX101            | 3            | 194 ± 32                                               | 91.2                 | 3/8                | <0.0001              |
| 9     | XTX101            | 10           | 133 ± 31                                               | 94                   | 5/8                | <0.0001              |

**Supplemental Table 4: Results from XTX101 in MB49 Model Study.** Tumor volume measurements, TGI calculations, and complete responses from MB49 tumor model study. <sup>a</sup>Mean ± SEM. <sup>b</sup>Tumor Growth Inhibition (TGI) = (1-T/C) × 100%; T and C are mean tumor volumes of treatment and vehicle control groups respectively on Day 16. <sup>c</sup>A 2-way repeated measures analysis of variance (ANOVA) with Bonferroni's post-hoc test was performed to determine the statistical significance of treatment versus isotype control. Day 16 results were tabulated.

| Group | Treatment                              | Tumor Volume (mm <sup>3</sup> ) <sup>a</sup><br>on Day 14 | TGI (%) <sup>b</sup> | p value <sup>c</sup> |
|-------|----------------------------------------|-----------------------------------------------------------|----------------------|----------------------|
| 1     | Isotype control 10 mg/kg               | 1446 ± 132                                                | -                    | -                    |
| 2     | XTX101 0.3 mg/kg                       | 1000 ± 109                                                | 34.22                | 0.8354               |
| 3     | RMP1-14 10 mg/kg                       | 931 ± 171                                                 | 39.56                | 0.3722               |
| 4     | XTX101 0.3 mg/kg +<br>RMP1-14 10 mg/kg | 374 ± 125                                                 | 82.34                | 0.0002               |

**Supplemental Table 5: Results from XTX101 + anti-PD-1 Combination Therapy in MC38 Tumor Model Study.**

Tumor volume measurements and TGI calculations from MC38 tumor model study. <sup>a</sup>Mean ± SEM. <sup>b</sup>Tumor Growth Inhibition (TGI) = (1-T/C) × 100%; T and C are mean tumor volumes of treatment and vehicle control groups respectively on Day 14.

<sup>c</sup>Compared to isotype control (Group 1) by Kruskal-Wallis test with Dunn's multiple comparison test on day 14 post-treatment.
