# Supplementary figures and images for: XTX101, a tumor-activated, Fc-enhanced anti-CTLA-4 monoclonal antibody, demonstrates tumor-growth inhibition and tumor-selective pharmacodynamics in mouse models of cancer
Source: PubMed Central journal article supplement — J Immunother Cancer. 2023 Dec 12;11(12):e007785. doi: 10.1136/jitc-2023-007785 (PMC10729150; doi:10.1136/jitc-2023-007785), 2023-12-12

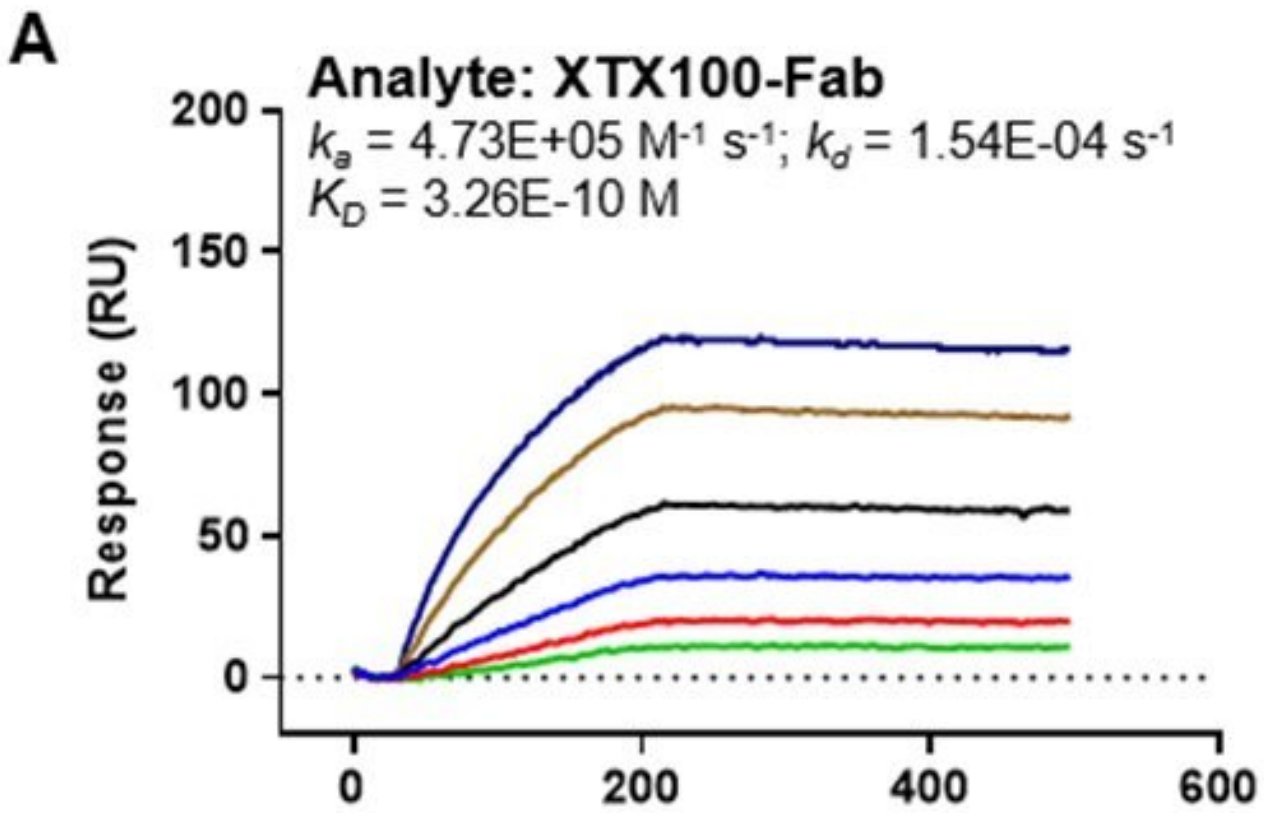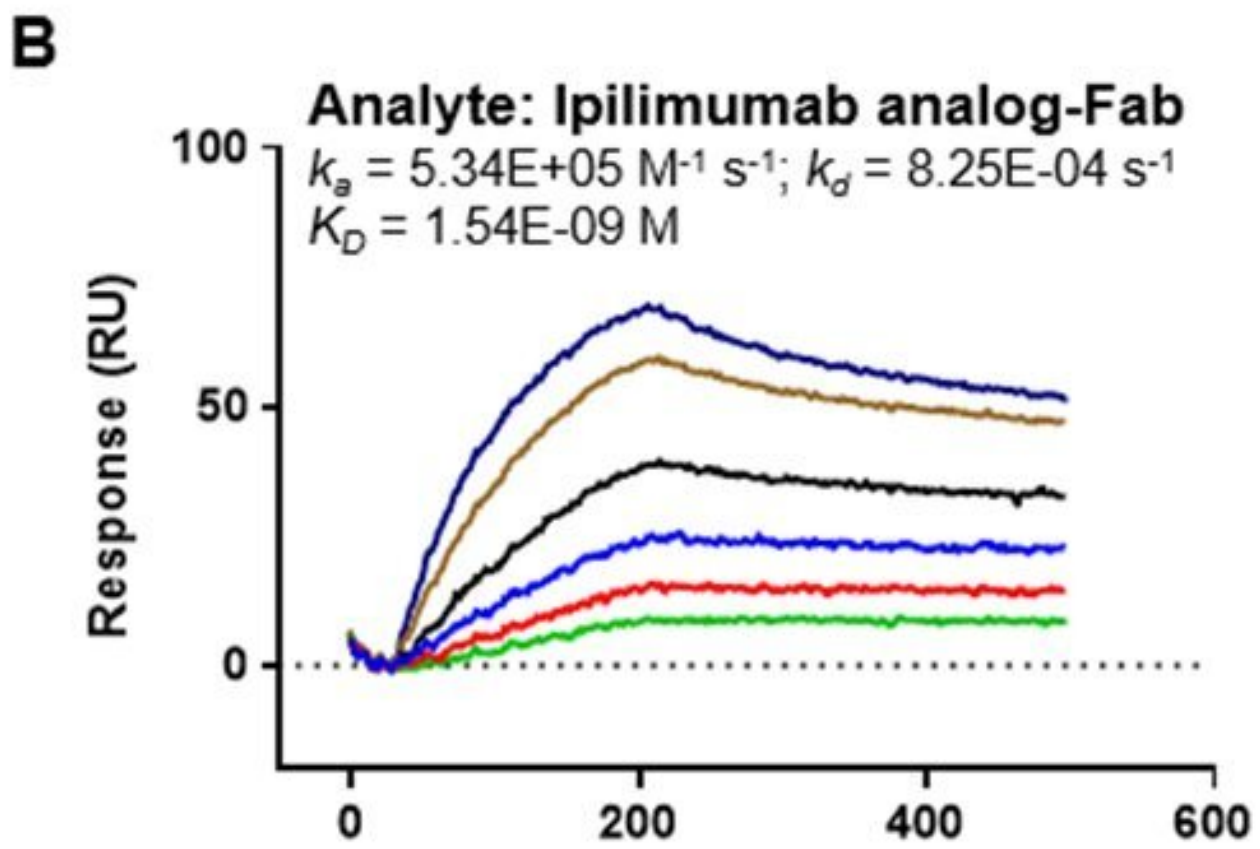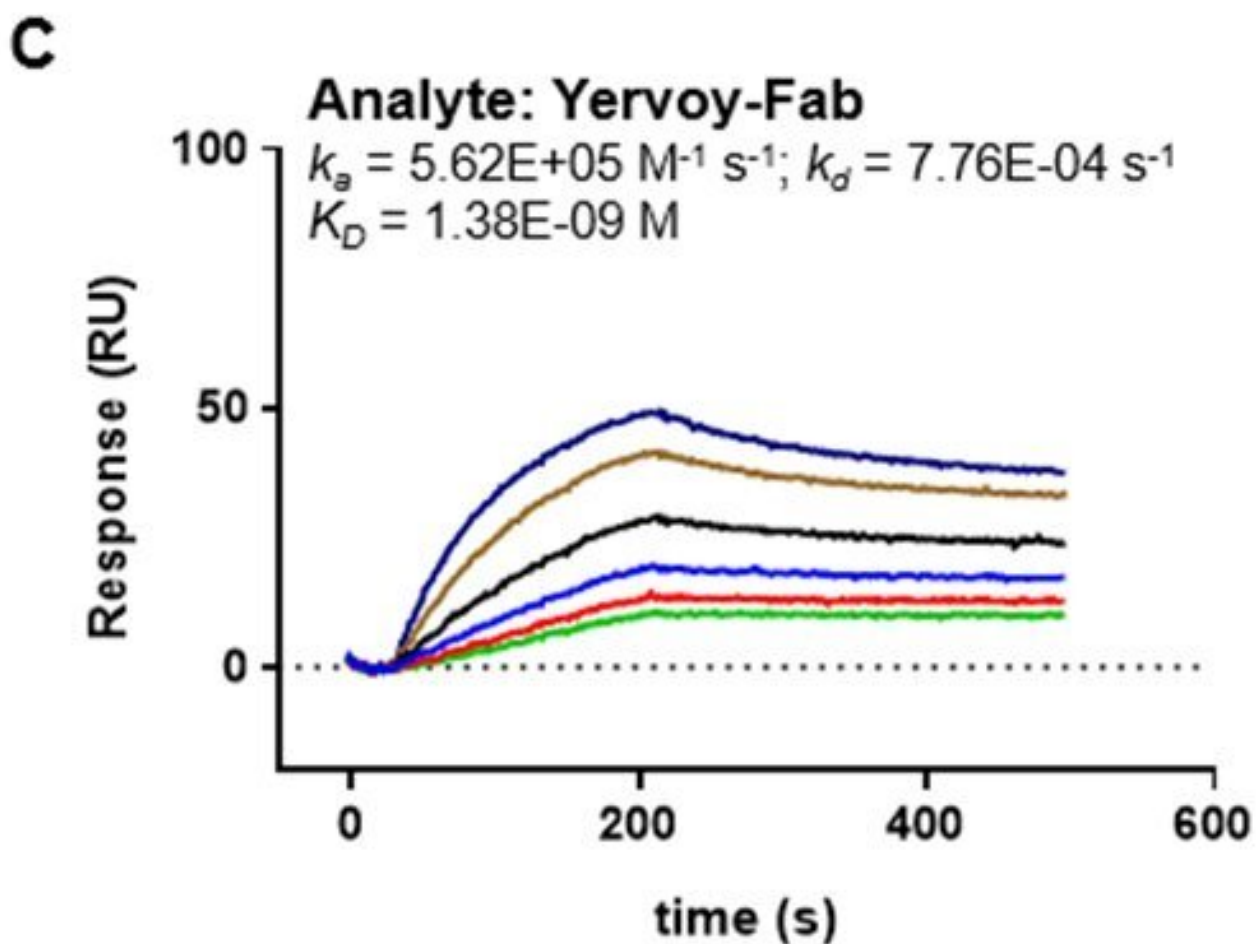

Supplement: jitc-2023-007785supp001.pdf [file jitc-2023-007785supp001.pdf]

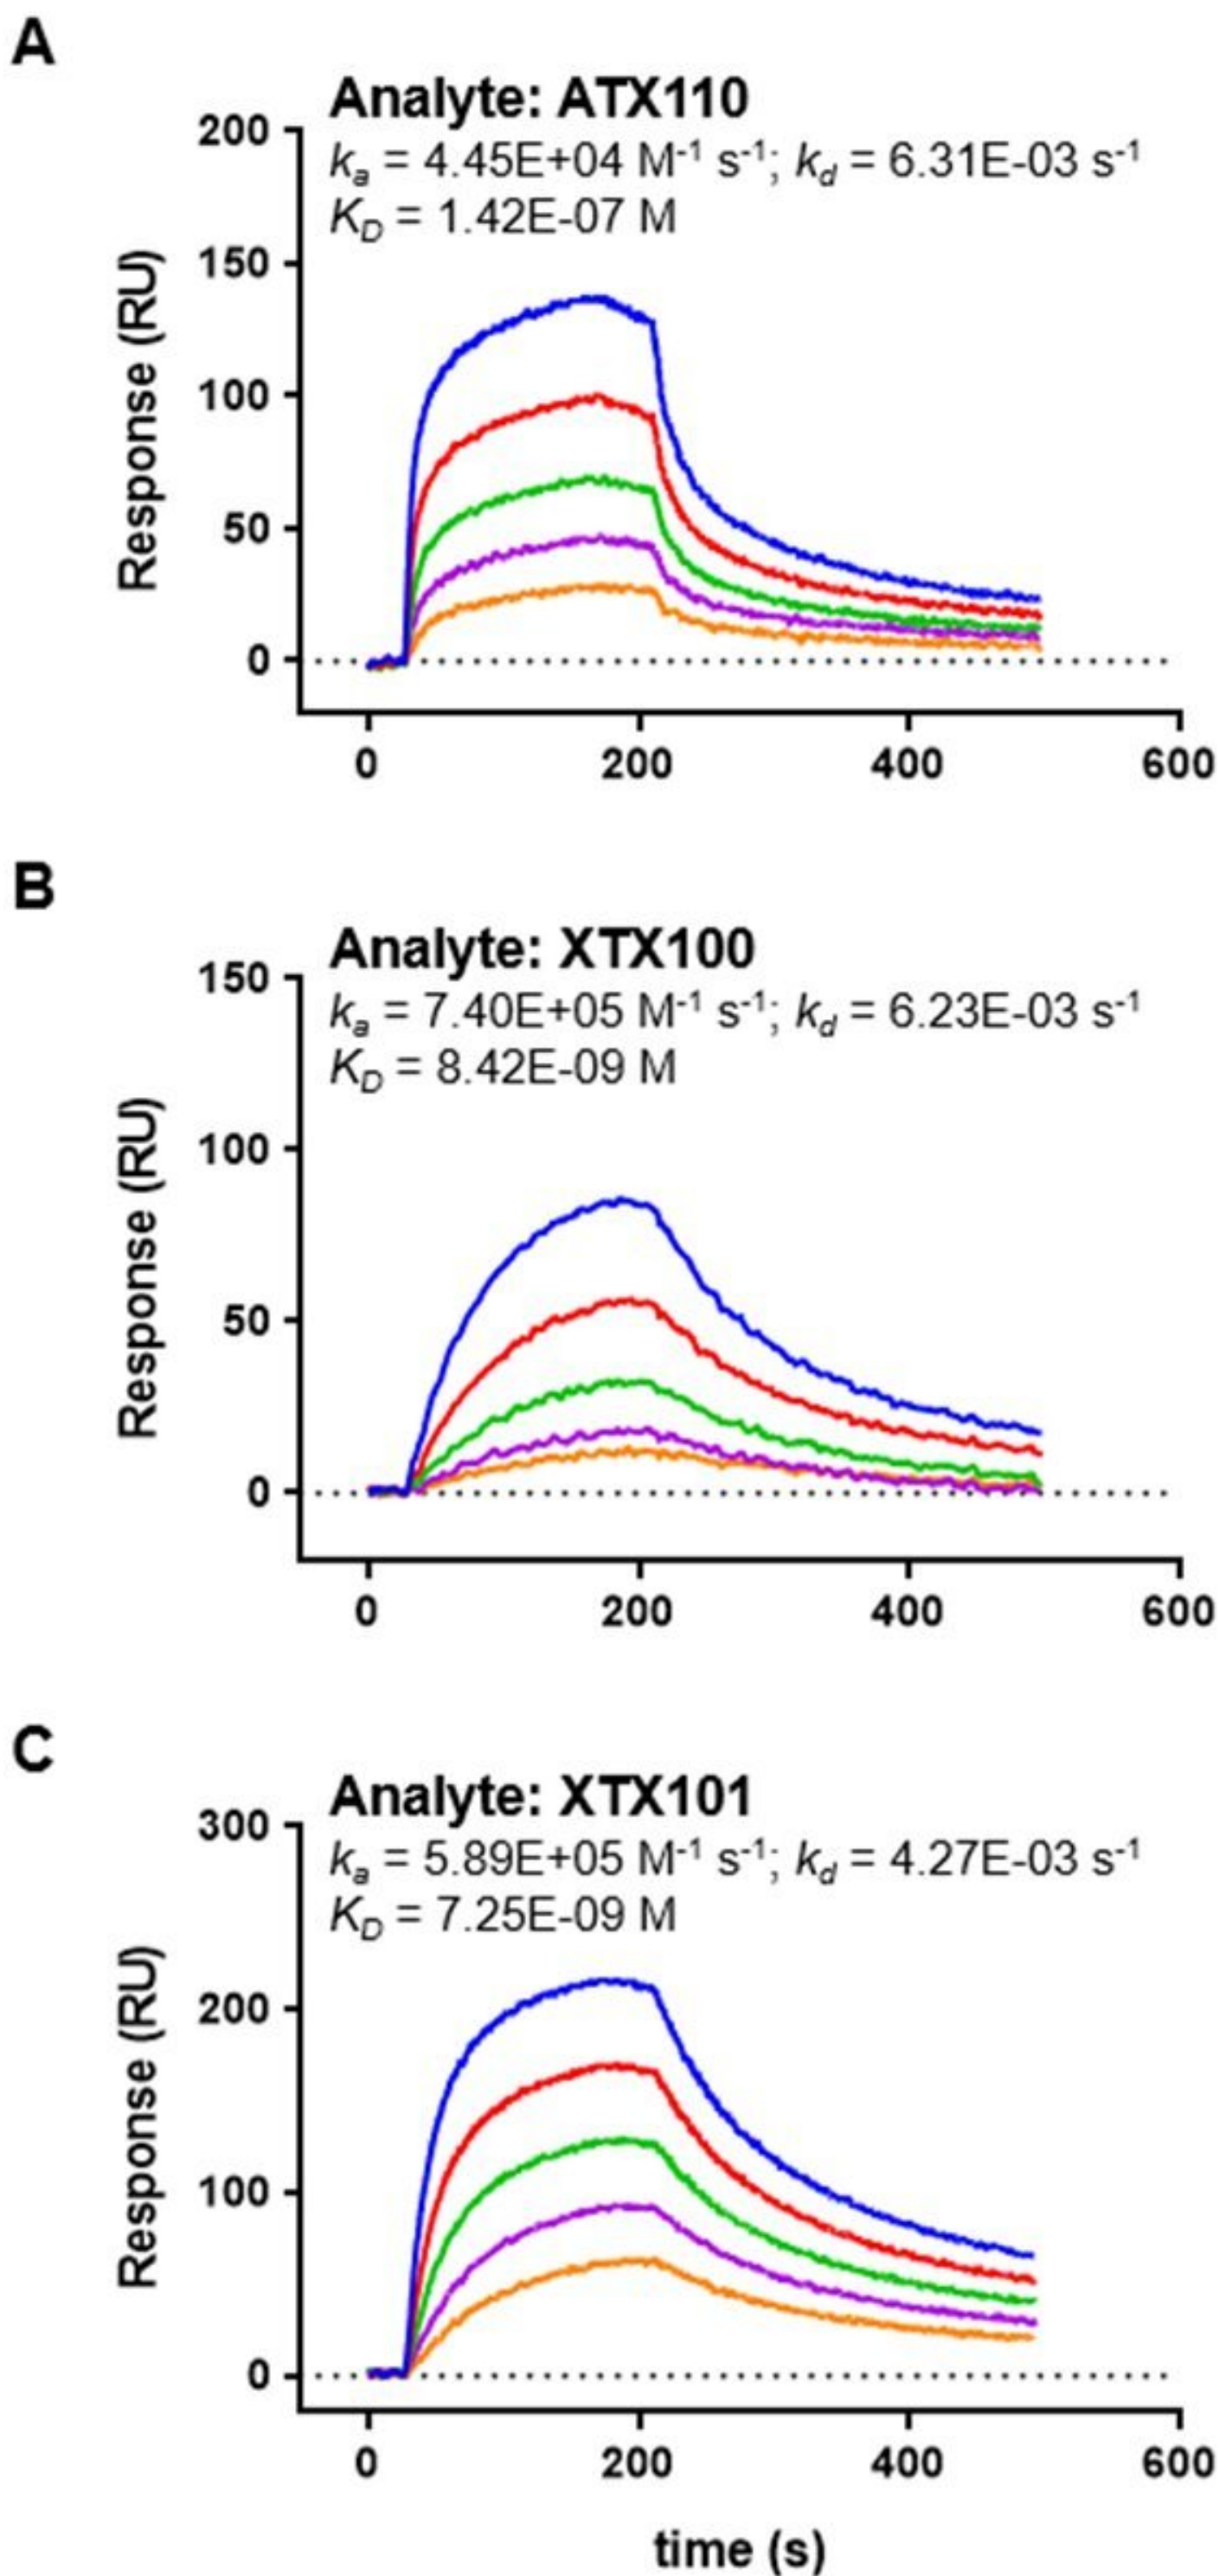

Supplement: jitc-2023-007785supp002.pdf [file jitc-2023-007785supp002.pdf]

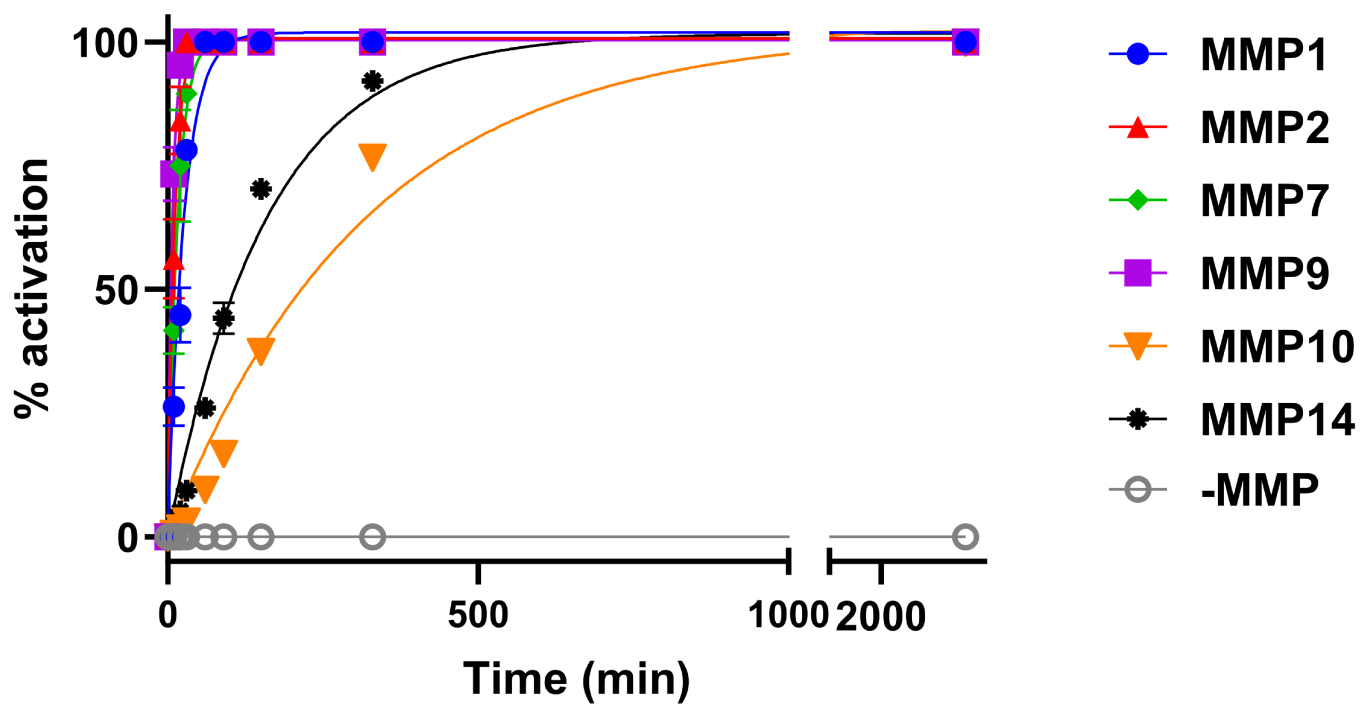

Supplement: jitc-2023-007785supp004.pdf [file jitc-2023-007785supp004.pdf]

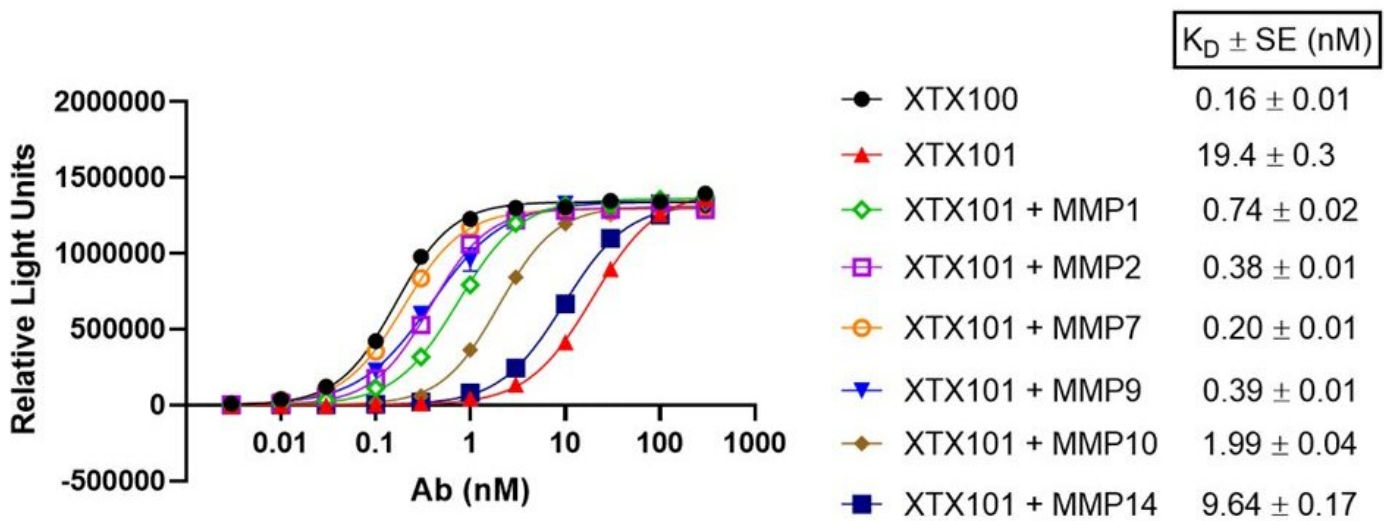

Supplement: jitc-2023-007785supp005.pdf [file jitc-2023-007785supp005.pdf]

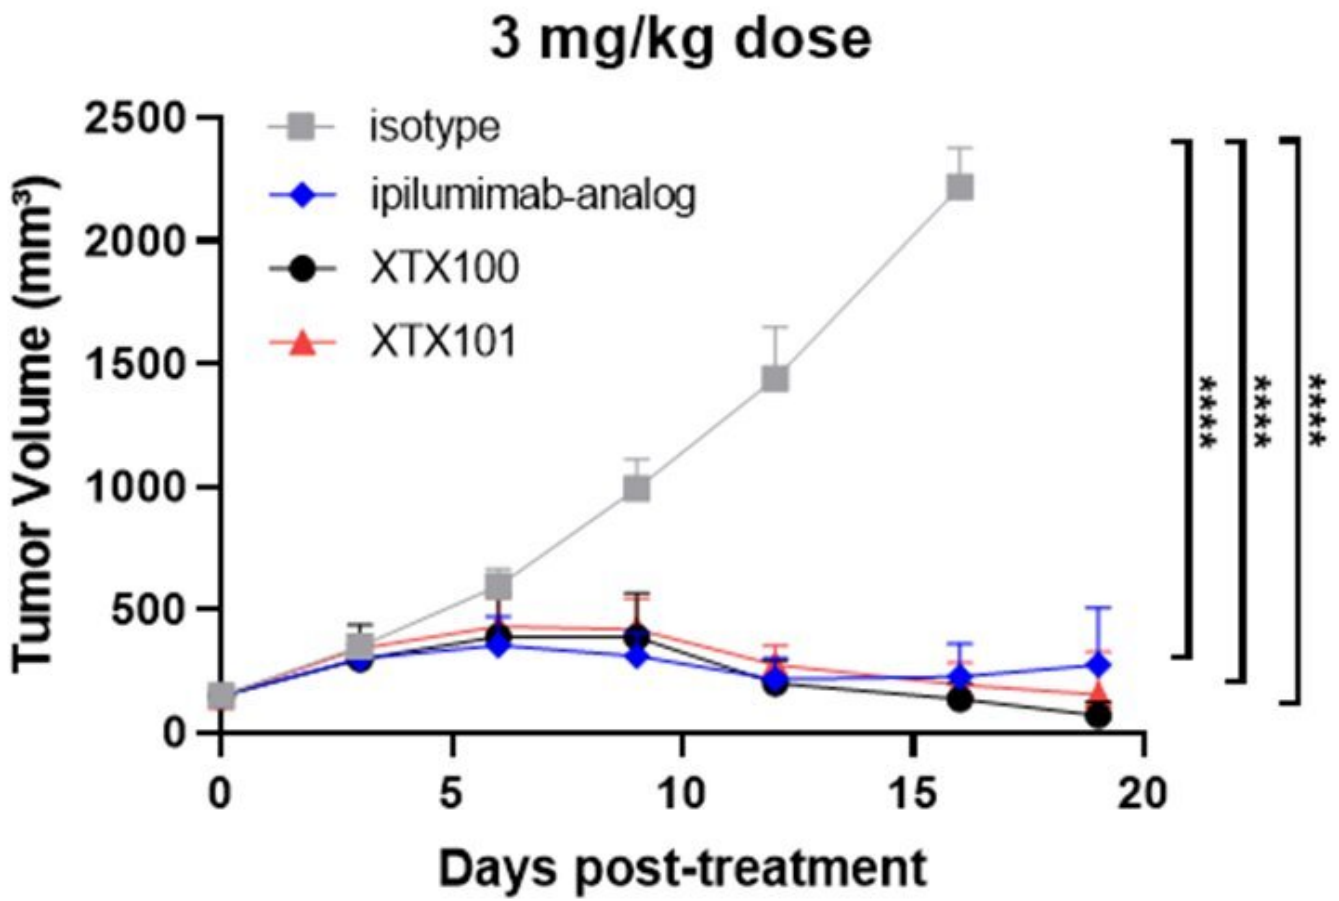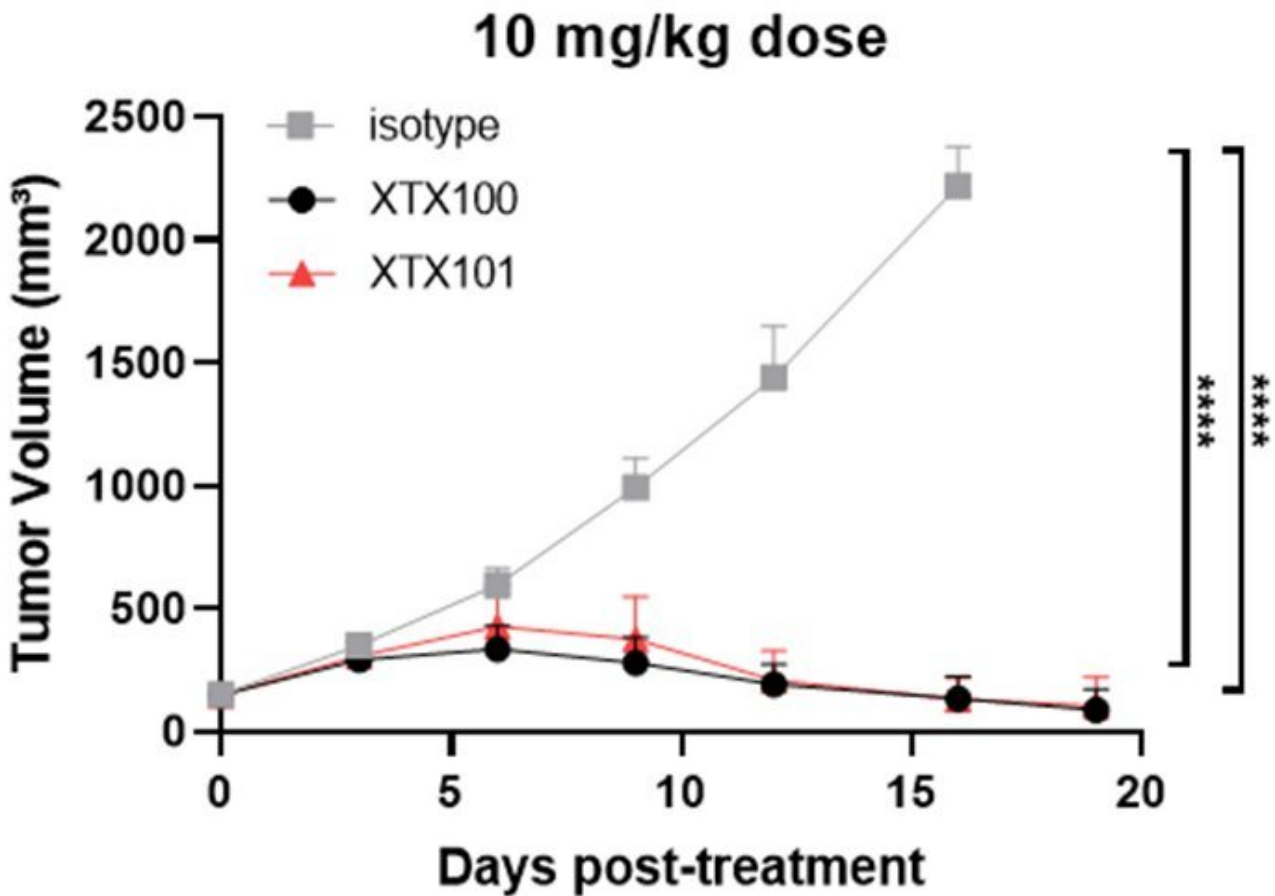

Supplement: jitc-2023-007785supp006.pdf [file jitc-2023-007785supp006.pdf]

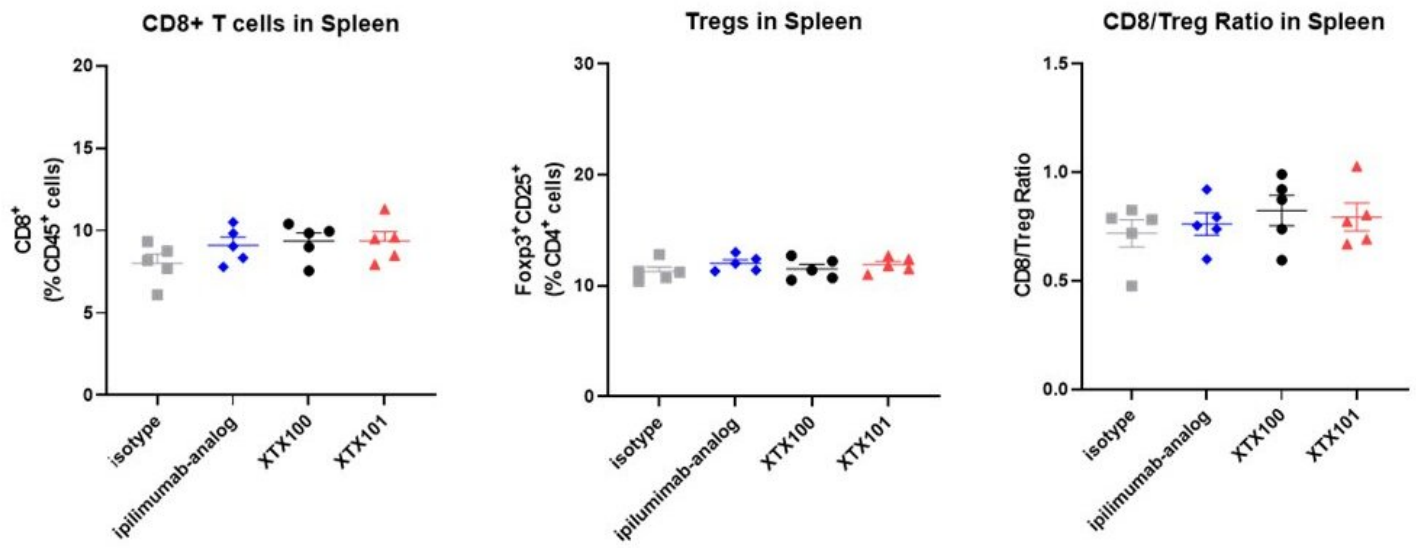

Supplement: jitc-2023-007785supp007.pdf [file jitc-2023-007785supp007.pdf]
